# Supplementary material for: Health economic evaluations comparing faecal microbiota transplantation with antibiotics for treatment of recurrent Clostridioides difficile infection: a systematic review
Source: PubMed Central journal article supplement (PMC7805077; doi:10.1186/s13561-021-00301-7), 2021-01-13
Supplement: 13561_2021_301_MOESM2_ESM.pdf [file 13561_2021_301_MOESM2_ESM.pdf]

## Additional file 2: Study characteristics

The table includes the general study characteristics of the health economic evaluations included in the study. QALYs = quality-adjusted life years. rCDI = recurrent *Clostridioides difficile* infection. FMT= faecal microbiota transplantation.

| Author and year                                    | Konijeti et al., 2014 [1]                                                                                                                            | Varier et al., 2015 [2]                                          | Lapointe-Shaw et al., 2016 [3]                                           | Merlo et al., 2016 [4]                                                                                              | Baro et al., 2017 [5]                                                                                                                                                               | Luo et al., 2020 [6]                      | Abdali et al., 2020 [7]                                                                                                                           |
|----------------------------------------------------|------------------------------------------------------------------------------------------------------------------------------------------------------|------------------------------------------------------------------|--------------------------------------------------------------------------|---------------------------------------------------------------------------------------------------------------------|-------------------------------------------------------------------------------------------------------------------------------------------------------------------------------------|-------------------------------------------|---------------------------------------------------------------------------------------------------------------------------------------------------|
| <b>Setting/country</b>                             | United States                                                                                                                                        | United States                                                    | Canada                                                                   | Australia                                                                                                           | France                                                                                                                                                                              | United States                             | United Kingdom                                                                                                                                    |
| <b>Analytic method</b>                             | Decision-tree                                                                                                                                        | Decision-tree                                                    | Markov, 6-weeks cycle                                                    | Markov, 10-days cycle                                                                                               | Decision-tree                                                                                                                                                                       | Decision-tree                             | Markov, 2-months cycle                                                                                                                            |
| <b>Time horizon</b>                                | 1 year, up to 2 additional recurrences                                                                                                               | 90 days, up to 1 additional recurrence                           | 18 weeks for costs, lifetime for effects, up to 2 additional recurrences | Not reported - presumably lifetime, number of additional recurrences not reported                                   | 78 days, up to 1 additional recurrence                                                                                                                                              | 6 months, up to 2 additional recurrences  | 1 year, up to 2 additional recurrences                                                                                                            |
| <b>Perspective</b>                                 | Societal                                                                                                                                             | Third-party payer                                                | Healthcare system                                                        | Not reported - presumably societal                                                                                  | Societal                                                                                                                                                                            | Modified third-party payer                | Healthcare system                                                                                                                                 |
| <b>Outcome measure</b>                             | QALYs                                                                                                                                                | QALYs                                                            | QALYs                                                                    | QALYs, life years                                                                                                   | QALYs                                                                                                                                                                               | QALYs                                     | QALYs                                                                                                                                             |
| <b>Patient population at inclusion</b>             | First rCDI, outpatient, mild-to-moderate                                                                                                             | Third rCDI, outpatient, severity not reported                    | First rCDI, severity not reported                                        | ≥1 rCDI, severity not reported                                                                                      | Second rCDI, outpatient, mild-to-moderate                                                                                                                                           | First rCDI, outpatient, mild-to-moderate, | ≥1 rCDI, hospitalised, severity not reported                                                                                                      |
| <b>Intervention</b>                                | FMT colonoscopy, enema or duodenal infusion.                                                                                                         | FMT colonoscopy                                                  | FMT colonoscopy, enema, or nasogastric tube                              | FMT colonoscopy or nasoduodenal tube                                                                                | FMT colonoscopy, enema, or duodenal infusion                                                                                                                                        | FMT colonoscopy or capsules               | FMT colonoscopy or nasogastric tube                                                                                                               |
| <b>Preceding treatment</b>                         | Oral vancomycin 500mg qid x 4d                                                                                                                       | Not reported                                                     | Oral vancomycin 125xmg qid x 14d                                         | Oral vancomycin 125mg qid x 4-5d and bowel lavage                                                                   | Oral vancomycin 500mg qid x 4d                                                                                                                                                      | Oral vancomycin 125mg qid x 10d           | Not reported                                                                                                                                      |
| <b>Treatment in case of additional recurrences</b> | FMT similar delivery method (second recurrence), oral pulse-taper vancomycin 125 mg qid x 10d + 125 mg every third day x 10 doses (third recurrence) | Oral vancomycin 250 mg qid x 14d + 6 weeks oral vancomycin taper | FMT similar delivery method                                              | FMT similar delivery method (first subsequent recurrence), oral vancomycin 125mg qid x 10d (additional recurrences) | FMT similar delivery method (mild-to-moderate or severe uncomplicated rCDI), oral vancomycin 500mg qid x10d plus intravenous metronidazole 500mg tid x10d (severe complicated rCDI) | FMT similar delivery method               | FMT similar delivery method (first subsequent recurrence), oral vancomycin 6-weeks taper pulse starting with 250mg (second subsequent recurrence) |

|                                                    |                                                                                                                                                                                                                                                               |                                                                            |                                                                                                                                         |                                                                                                                    |                                                                                                                                               |                                                                                                                                                                                                                                                    |                                                                                                                                                                                  |
|----------------------------------------------------|---------------------------------------------------------------------------------------------------------------------------------------------------------------------------------------------------------------------------------------------------------------|----------------------------------------------------------------------------|-----------------------------------------------------------------------------------------------------------------------------------------|--------------------------------------------------------------------------------------------------------------------|-----------------------------------------------------------------------------------------------------------------------------------------------|----------------------------------------------------------------------------------------------------------------------------------------------------------------------------------------------------------------------------------------------------|----------------------------------------------------------------------------------------------------------------------------------------------------------------------------------|
| <b>Control treatment</b>                           | Oral metronidazole 500mg tid x 10d, oral vancomycin 125mg qid x 10d, or oral fidaxomicin 200mg bid x 10d                                                                                                                                                      | Oral vancomycin 250 mg qid x 14d + 6 weeks oral vancomycin taper           | Oral metronidazole 500mg tid x 14d, oral vancomycin 125mg qid x 14d, or oral fidaxomicin 200mg bid x 10d                                | Oral vancomycin 125mg qid x 14d                                                                                    | Pulsed-tapered vancomycin 125mg qid x 10d + 500mg qod x 21d, or fidaxomicin 200mg tid x 10d                                                   | Tapered vancomycin 125 mg qid x 14d + 125 mg bid x 7d + 125 mg qd x 7d + 125 mg qod x 7d + 125 mg every third day x 7d, fidaxomicin 200mg bid x10d, or a combination of bezlotoxumab 10mg/kg one-time infusion and oral vancomycin 125mg qid x 10d | Oral vancomycin 250 or 500mg qid x 10d or oral fidaxomicin 200mg x 10d                                                                                                           |
| Treatment in case of additional recurrences        | Patients treated with metronidazole: oral vancomycin (second recurrence) or pulse-taper vancomycin (third recurrence)<br>Patients treated with vancomycin or fidaxomicin: pulse-taper vancomycin (second recurrence) or FMT by colonoscopy (third recurrence) | Oral vancomycin 250 mg qid x 14d + 6 weeks oral vancomycin taper           | 6 weeks taper-pulse oral vancomycin: 125 mg qid x 14d + 125 mg bid x 7d + 125mg qd x 7d + 125 mg qod x 7d + 125 mg every third day x 7d | Oral vancomycin 125mg qid x 10d                                                                                    | Similar treatment (mild-to-moderate or severe uncomplicated rCDI) or oral vancomycin plus intravenous metronidazole (severe complicated rCDI) | Not reported (second recurrence), FMT by colonoscopy (third recurrence).                                                                                                                                                                           | Similar treatment for vancomycin (first subsequent recurrence), oral vancomycin 6-weeks taper pulse starting with 250mg (second subsequent recurrence)                           |
| <b>WTP threshold</b> (2019-level GBP)              | 37,860 GBP (50,000 USD, 2012-level)                                                                                                                                                                                                                           | Not reported                                                               | 30,923 GBP (50,000 CAN, 2014-level)                                                                                                     | Not reported                                                                                                       | 30913 GBP (32,000 EUR, 2016-level)                                                                                                            | 68,000 GBP (100,000 USD, 2019-level)                                                                                                                                                                                                               | 20,340 GBP (20,000 GBP, 2018-level)                                                                                                                                              |
| <b>Cost-effective alternative</b> (2019-level GBP) | FMT colonoscopy more effective and costlier than vancomycin, ICER 12,884 GBP/QALY (17,106 USD, 2012-level)                                                                                                                                                    | FMT colonoscopy more effective and less costly (dominant) than vancomycin. | FMT colonoscopy more effective and less costly (dominant) than vancomycin                                                               | FMT nasoduodenal tube and FMT colonoscopy more effective and less costly (dominant) than vancomycin <sup>a</sup> . | FMT enema more effective and costlier than pulsed-tapered vancomycin, ICER 17,478 GBP/QALY (18,092 EUR, 2016-level)                           | FMT colonoscopy and FMT capsules more (or equally) effective and less costly (dominant) than all other alternatives <sup>b</sup> .                                                                                                                 | FMT nasogastric tube (dominant compared with antibiotics). FMT colonoscopy more effective and costlier than FMT nasogastric tube ICER 246,642 GBP/QALY (242,524 GBP, 2018-level) |

<sup>a</sup>FMT by nasoduodenal tube is reported as being equally effective but less costly than FMT by colonoscopy. FMT by nasoduodenal tube is therefore considered the most cost-effective alternative by the authors of the present systematic review.

<sup>b</sup>FMT by colonoscopy is reported as being more effective and less costly than all other alternatives (Table 3 in Luo et al.). FMT by colonoscopy is therefore considered the most cost-effective alternative by the authors of the present systematic review.

## References

1. Konijeti GG, Sauk J, Shrimel MG, Gupta M, Ananthakrishnan AN. Cost-effectiveness of competing strategies for management of recurrent clostridium difficile infection: A decision analysis. *Clinical Infectious Diseases*. 2014;58(11):1507-1514.
2. Varier RU, Biltaji E, Smith KJ, et al. Cost-Effectiveness Analysis of Fecal Microbiota Transplantation for Recurrent Clostridium difficile Infection. *Infection Control and Hospital Epidemiology*. 2015;36(4):438-444.
3. Lapointe-Shaw L, Tran KL, Coyte PC, et al. Cost-Effectiveness Analysis of Six Strategies to Treat Recurrent Clostridium difficile Infection. *PloS one*. 2016;11(2):e0149521.
4. Merlo G, Graves N, Brain D, Connelly LB. Economic evaluation of fecal microbiota transplantation for the treatment of recurrent Clostridium difficile infection in Australia. *Journal of gastroenterology and hepatology*. 2016;31(12):1927-1932.
5. Baro E, Galperine T, Denies F, et al. Cost-Effectiveness Analysis of Five Competing Strategies for the Management of Multiple Recurrent Community-Onset Clostridium difficile Infection in France. *PloS one*. 2017;12(1):e0170258.
6. Luo Y, Lucas AL, Grinspan AM. Fecal Transplants by Colonoscopy and Capsules Are Cost-Effective Strategies for Treating Recurrent Clostridioides difficile Infection. *Digestive diseases and sciences*. 2020;65(4):1125-1133.
7. Abdali ZI, Roberts TE, Barton P, Hawkey PM. Economic evaluation of Faecal microbiota transplantation compared to antibiotics for the treatment of recurrent Clostridioides difficile infection. *EClinicalMedicine*. 2020;24:100420.
