# Supplementary material for: Health economic evaluations comparing faecal microbiota transplantation with antibiotics for treatment of recurrent Clostridioides difficile infection: a systematic review
Source: PubMed Central journal article supplement (PMC7805077; doi:10.1186/s13561-021-00301-7), 2021-01-13
Supplement: 13561_2021_301_MOESM3_ESM.pdf [file 13561_2021_301_MOESM3_ESM.pdf]

### Additional file 3: Assessment of cost-effectiveness

The table includes an assessment of the cost-effectiveness of faecal microbiota transplantation (FMT) compared with antibiotics in alternative treatment scenarios. If indicated, an incremental cost-effectiveness ratio (ICER) is calculated as costs per additional quality-adjusted life-year (QALY) between the relevant alternatives. The ICER is compared with the willingness-to-pay (WTP)-threshold stated in the study: if the ICER is below the WTP-threshold, the alternative is considered cost-effective. The cost-effective treatment alternative in each scenario is indicated in italics. Authors' calculation/interpretation refer to calculations/interpretations made by the authors of the present systematic review.

| <b>Konijeti et al., 2014 [1], (WTP=50,000)</b>                                  |              |               |               |
|---------------------------------------------------------------------------------|--------------|---------------|---------------|
| <b>Scenario: All strategies available (as reported in the study)</b>            |              |               |               |
| <b>Treatment</b>                                                                | <b>Costs</b> | <b>QALYs</b>  | <b>ICER</b>   |
| Vancomycin                                                                      | 2,912        | 0.8580        |               |
| <i>FMT colonoscopy</i>                                                          | <i>3,149</i> | <i>0.8719</i> | <i>17,016</i> |
| Metronidazole                                                                   | 3,941        | 0.8292        | Dominated     |
| FMT enema                                                                       | 4,090        | 0.8543        | Dominated     |
| FMT duodenal infusion                                                           | 4,208        | 0.8553        | Dominated     |
| Fidaxomicin                                                                     | 4,261        | 0.8653        | Dominated     |
| <b>Scenario: Restricted to FMT enema (as reported in the study)</b>             |              |               |               |
| <b>Treatment</b>                                                                | <b>Costs</b> | <b>QALYs</b>  | <b>ICER</b>   |
| <i>Vancomycin</i>                                                               | <i>3,488</i> | <i>0.8485</i> |               |
| Metronidazole                                                                   | 3,941        | 0.8292        | Dominated     |
| FMT enema                                                                       | 4,090        | 0.8543        | 105,003       |
| Fidaxomicin                                                                     | 4,602        | 0.8597        | 99,862        |
| <b>Scenario: Restricted to FMT duodenal infusion (as reported in the study)</b> |              |               |               |
| <b>Treatment</b>                                                                | <b>Costs</b> | <b>QALYs</b>  | <b>ICER</b>   |
| <i>Vancomycin</i>                                                               | <i>3,531</i> | <i>0.8484</i> |               |
| Metronidazole                                                                   | 3,941        | 0.8292        | Dominated     |
| FMT duodenal infusion                                                           | 4,208        | 0.8553        | 97,352        |
| Fidaxomicin                                                                     | 4,628        | 0.8596        | 98,443        |

| <b>Varier et al., 2015 [2], (WTP=not reported)</b>                   |              |              |             |
|----------------------------------------------------------------------|--------------|--------------|-------------|
| <b>Scenario: All strategies available (as reported in the study)</b> |              |              |             |
| <b>Treatment</b>                                                     | <b>Costs</b> | <b>QALYs</b> | <b>ICER</b> |
| <i>FMT colonoscopy</i>                                               | <i>1669</i>  | <i>0.242</i> |             |
| Vancomycin                                                           | 3788         | 0.235        | Dominated   |

| <b>Lapointe-Shaw et al., 2016 [3], (WTP=50,000)</b>                         |              |              |              |
|-----------------------------------------------------------------------------|--------------|--------------|--------------|
| <b>Scenario: All strategies available (as reported in the study)</b>        |              |              |              |
| <b>Treatment</b>                                                            | <b>Costs</b> | <b>QALYs</b> | <b>ICER</b>  |
| <i>FMT colonoscopy</i>                                                      | <i>5,246</i> | <i>9.40</i>  |              |
| Metronidazole                                                               | 5,386        | 9.09         | Dominated    |
| FMT enema                                                                   | 5,667        | 9.26         | Dominated    |
| Vancomycin                                                                  | 5,929        | 9.03         | Dominated    |
| FMT nasogastric tube                                                        | 5,935        | 9.15         | Dominated    |
| Fidaxomicin                                                                 | 7,319        | 9.16         | Dominates    |
| <b>Scenario: Restricted to FMT enema (as reported in the study)</b>         |              |              |              |
| <b>Treatment</b>                                                            | <b>Costs</b> | <b>QALYs</b> | <b>ICER</b>  |
| Metronidazole                                                               | 5,386        | 9.09         |              |
| <i>FMT enema</i>                                                            | <i>5,667</i> | <i>9.26</i>  | <i>1,708</i> |
| Vancomycin                                                                  | 5,929        | 9.03         | Dominated    |
| Fidaxomicin                                                                 | 7,319        | 9.16         | Dominated    |
| <b>Scenario: Restricted to FMT nasogastric tube (authors' calculations)</b> |              |              |              |
| <b>Treatment</b>                                                            | <b>Costs</b> | <b>QALYs</b> | <b>ICER</b>  |
| Metronidazole                                                               | 5,386        | 9.09         |              |
| Vancomycin                                                                  | 5,929        | 9.03         | Dominated    |
| <i>FMT nasogastric tube</i>                                                 | <i>5,935</i> | <i>9.15</i>  | <i>9,150</i> |
| Fidaxomicin                                                                 | 7,319        | 9.16         | 138,400      |

| <b>Merlo et al., 2016 [4], (WTP=not reported)</b>                      |                                                   |                                                   |                                     |
|------------------------------------------------------------------------|---------------------------------------------------|---------------------------------------------------|-------------------------------------|
| <b>Scenario: All strategies available (as reported in the study)</b>   |                                                   |                                                   |                                     |
| <b>Treatment</b>                                                       | <b>Incremental costs compared with vancomycin</b> | <b>Incremental QALYs compared with vancomycin</b> | <b>ICER</b>                         |
| <i>FMT nasoduodenal tube</i>                                           | -4,094                                            | 1.2                                               |                                     |
| FMT colonoscopy                                                        | -4,045                                            | 1.2                                               | Dominated (authors' interpretation) |
| Vancomycin                                                             |                                                   |                                                   | Dominated                           |
| <b>Scenario: Restricted to FMT colonoscopy (authors' calculations)</b> |                                                   |                                                   |                                     |
| <b>Treatment</b>                                                       | <b>Incremental costs compared with vancomycin</b> | <b>Incremental QALYs</b>                          | <b>ICER</b>                         |
| <i>FMT colonoscopy</i>                                                 | -4,045                                            | 1.2                                               |                                     |
| Vancomycin                                                             |                                                   |                                                   | Dominated                           |

| <b>Baro et al., 2017 [5], (WTP=32,000)</b>                               |              |              |             |
|--------------------------------------------------------------------------|--------------|--------------|-------------|
| <b>Scenario: All strategies available (as reported in the study)</b>     |              |              |             |
| <b>Treatment</b>                                                         | <b>Costs</b> | <b>QALYs</b> | <b>ICER</b> |
| Vancomycin                                                               | 1,235        | 0.1812       |             |
| <i>FMT enema</i>                                                         | 1,610        | 0.2019       | 18,092      |
| FMT colonoscopy                                                          | 1,816        | 0.2047       | 73,571      |
| FMT duodenal infusion                                                    | 1,834        | 0.2013       | Dominated   |
| Fidaxomicin                                                              | 2,464        | 0.1988       | Dominated   |
| <b>Scenario: Restricted to FMT colonoscopy (authors' calculations)</b>   |              |              |             |
| <b>Treatment</b>                                                         | <b>Costs</b> | <b>QALYs</b> | <b>ICER</b> |
| Vancomycin                                                               | 1,235        | 0.1812       |             |
| <i>FMT colonoscopy</i>                                                   | 1,816        | 0.2047       | 24,723      |
| Fidaxomicin                                                              | 2,464        | 0.1988       | Dominated   |
| <b>Scenario: Restricted to FMT duodenal tube (authors' calculations)</b> |              |              |             |
| <b>Treatment</b>                                                         | <b>Costs</b> | <b>QALYs</b> | <b>ICER</b> |
| Vancomycin                                                               | 1,235        | 0.1812       |             |
| <i>FMT duodenal infusion</i>                                             | 1,834        | 0.2012       | 29,801      |
| Fidaxomicin                                                              | 2,464        | 0.1988       | Dominated   |

| <b>Luo et al., 2020 [6], (WTP=100,000)</b>                           |              |              |                                     |
|----------------------------------------------------------------------|--------------|--------------|-------------------------------------|
| <b>Scenario: All strategies available (as reported in the study)</b> |              |              |                                     |
| <b>Treatment</b>                                                     | <b>Costs</b> | <b>QALYs</b> | <b>ICER</b>                         |
| <i>FMT colonoscopy</i>                                               | 5,250        | 0.435        |                                     |
| FMT capsules                                                         | 5,436        | 0.429        | Dominated (authors' interpretation) |
| Vancomycin                                                           | 7,006        | 0.421        | Dominated                           |
| Fidaxomicin                                                          | 7,557        | 0.429        | Dominated                           |
| Bezlotoxumab                                                         | 9,612        | 0.426        | Dominated                           |
| <b>Scenario: Restricted to FMT capsules (authors' calculations)</b>  |              |              |                                     |
| <b>Treatment</b>                                                     | <b>Costs</b> | <b>QALYs</b> | <b>ICER</b>                         |
| <i>FMT capsules</i>                                                  | 5,436        | 0.429        |                                     |
| Vancomycin                                                           | 7,006        | 0.421        | Dominated                           |
| Fidaxomicin                                                          | 7,557        | 0.429        | Dominated                           |
| Bezlotoxumab                                                         | 9,612        | 0.426        | Dominated                           |

| <b>Abdali et al., 2020 [7], (WTP=20,000)</b>                         |              |              |             |
|----------------------------------------------------------------------|--------------|--------------|-------------|
| <b>Scenario: All strategies available (as reported in the study)</b> |              |              |             |
| <b>Treatment</b>                                                     | <b>Costs</b> | <b>QALYs</b> | <b>ICER</b> |
| <i>FMT nasogastric tube</i>                                          | 8,877        | 0.645        |             |
| FMT colonoscopy                                                      | 11,716       | 0.657        | 24,2514     |
| Fidaxomicin                                                          | 14,339       | 0.577        | Dominated   |
| Vancomycin                                                           | 17,279       | 0.513        | Dominated   |

| Scenario: Restricted to FMT colonoscopy (authors' calculations) |        |       |           |
|-----------------------------------------------------------------|--------|-------|-----------|
| Treatment                                                       | Costs  | QALYs | ICER      |
| <i>FMT colonoscopy</i>                                          | 11,716 | 0.657 |           |
| Fidaxomicin                                                     | 14,399 | 0.577 | Dominated |
| Vancomycin                                                      | 1,729  | 0.513 | Dominated |

## References

1. Konijeti GG, Sauk J, Shrime MG, Gupta M, Ananthkrishnan AN. Cost-effectiveness of competing strategies for management of recurrent clostridium difficile infection: A decision analysis. *Clinical Infectious Diseases*. 2014;58(11):1507-1514.
2. Varier RU, Biltaji E, Smith KJ, et al. Cost-Effectiveness Analysis of Fecal Microbiota Transplantation for Recurrent Clostridium difficile Infection. *Infection Control and Hospital Epidemiology*. 2015;36(4):438-444.
3. Lapointe-Shaw L, Tran KL, Coyte PC, et al. Cost-Effectiveness Analysis of Six Strategies to Treat Recurrent Clostridium difficile Infection. *PloS one*. 2016;11(2):e0149521.
4. Merlo G, Graves N, Brain D, Connelly LB. Economic evaluation of fecal microbiota transplantation for the treatment of recurrent Clostridium difficile infection in Australia. *Journal of gastroenterology and hepatology*. 2016;31(12):1927-1932.
5. Baro E, Galperine T, Denies F, et al. Cost-Effectiveness Analysis of Five Competing Strategies for the Management of Multiple Recurrent Community-Onset Clostridium difficile Infection in France. *PloS one*. 2017;12(1):e0170258.
6. Luo Y, Lucas AL, Grinspan AM. Fecal Transplants by Colonoscopy and Capsules Are Cost-Effective Strategies for Treating Recurrent Clostridioides difficile Infection. *Digestive diseases and sciences*. 2020;65(4):1125-1133.
7. Abdali ZI, Roberts TE, Barton P, Hawkey PM. Economic evaluation of Faecal microbiota transplantation compared to antibiotics for the treatment of recurrent Clostridioides difficile infection. *EClinicalMedicine*. 2020;24:100420.
